# Supplementary material
Source: Springer Nature journal article supplement (https://www.springermedizin.de/resource/supplementary/13012_2006_71_MOESM1_ESM.pdf/9629184)
Supplement: MOESM1 [file 9629184]

## **Pre-Conditions**

Identification of need for new intervention

Identification of effective intervention that fits local settings

Packaging intervention for training and assessment

## **Pre-Implementation**

Orientation

    Explain core elements

    Customize delivery

Logistics planning

Staff training

Technical assistance

## **Implementation**

Ongoing support of and partnership with community organizations

Booster training

Process evaluation

Feedback and refinement of intervention package and training

## **Maintenance and Evolution**

Organizational and financial changes to sustain intervention

Prepare package for national dissemination

Re-customize delivery as need arises
